# Supplementary material for: OrthoClust: an orthology-based network framework for clustering data across multiple species
Source: PubMed Central journal article supplement (PMC4289247; doi:10.1186/gb-2014-15-8-r100), 2014-08-28
Supplement: 13059_2014_3371_MOESM1_ESM.pdf [file 13059_2014_3371_MOESM1_ESM.pdf]

# OrthoClust: An orthology-based network framework for expression clustering across multiple species

**Supplementary Figure 1**

**Supplementary Figure 2**

**Supplementary Figure 3**

**Supplementary Figure 4**

**Supplementary Figure 5**

**Supplementary Figure 6**

**Supplementary Figure 7**

**Supplementary Figure 8**

Supplementary Figure 1

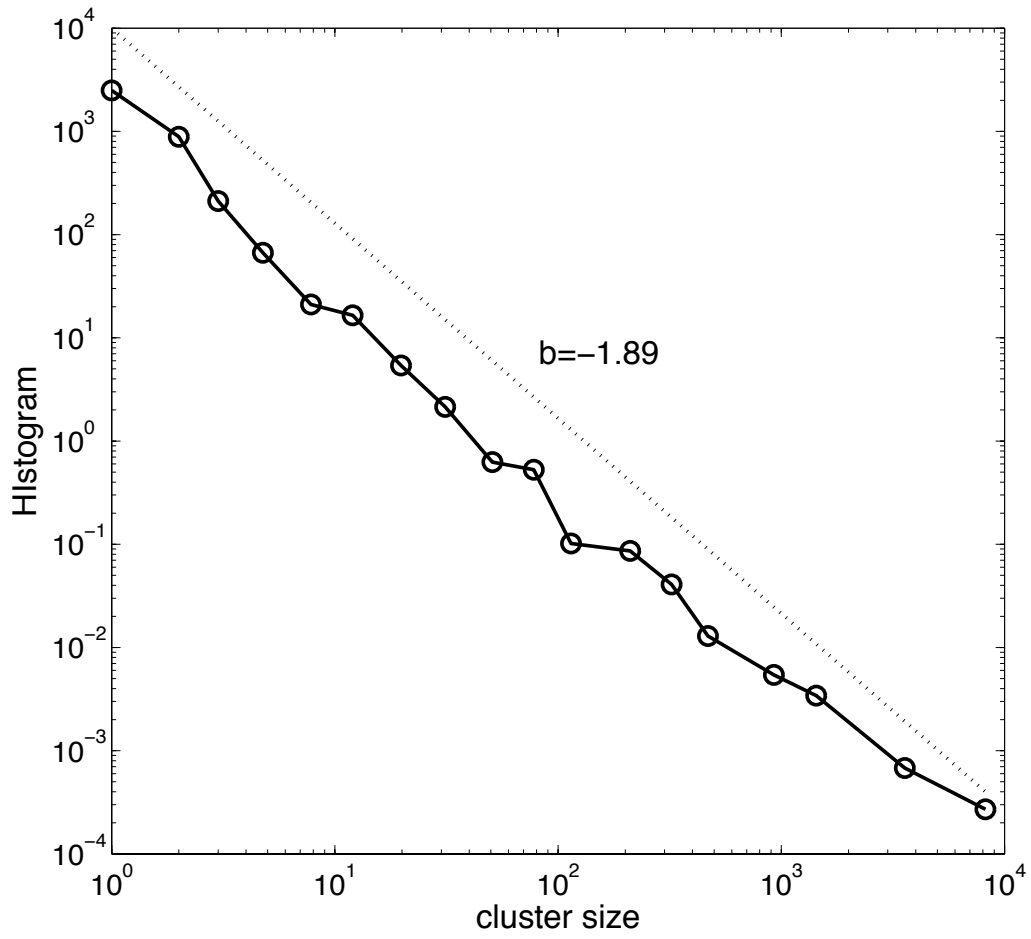

The size distribution of the resultant modules. The sizes follow a power law distribution of exponent -1.89.

Supplementary Figure 2

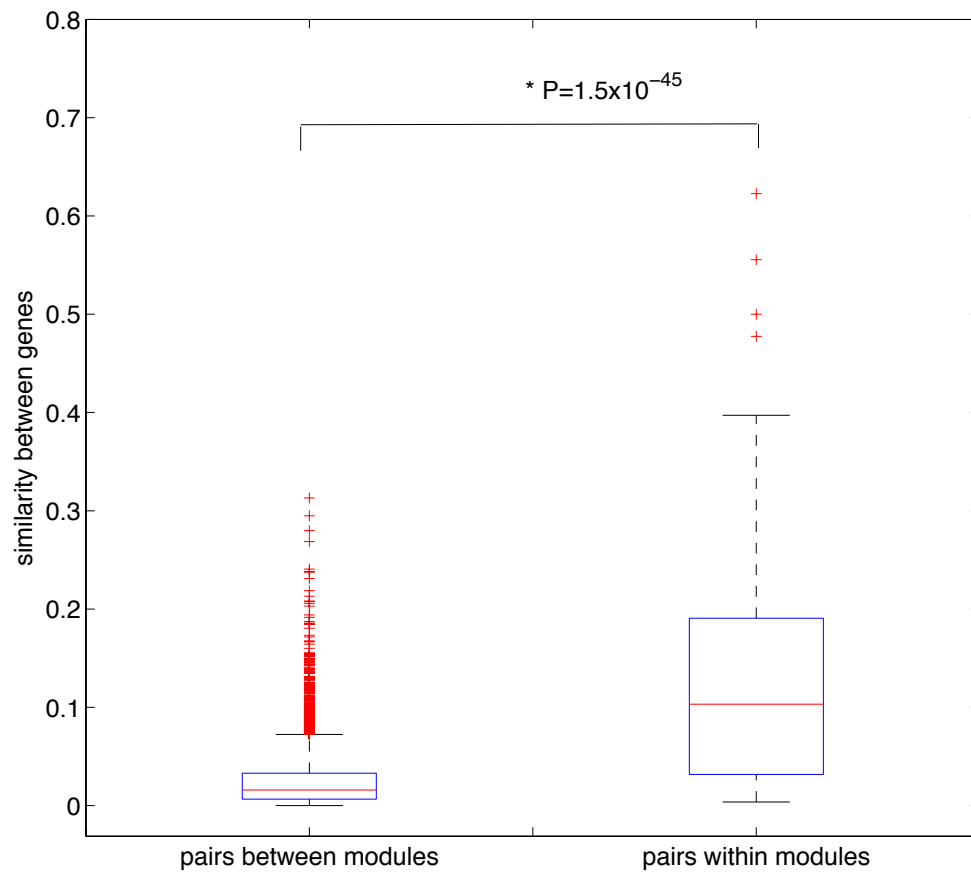

The similarity between genes within modules versus the similarity between genes between modules. Unlike Figure 4 in the main text, the orthologs inside modules were removed. The overlap between genes within modules is still significantly higher.

### Supplementary Figure 3

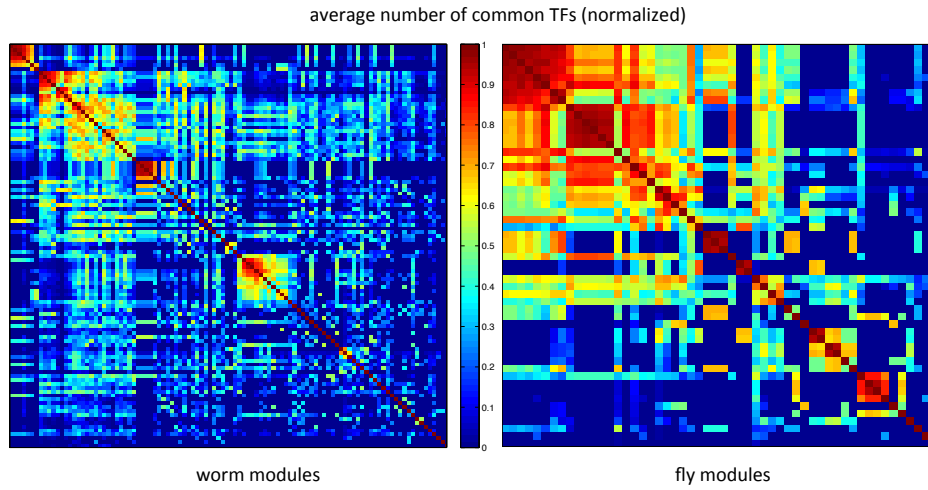

Average number of common transcription factors for pairs of genes within modules and between modules. Matrix element  $(i,j)$  means for all pairwise combinations of genes between modules  $i$  and module  $j$ , the average number of common transcription factors. The high average along diagonal means genes within a module share more common regulators than genes between modules. For visualization, the elements are scaled such that  $\frac{M(i,j)}{\sqrt{M(i,i)M(j,j)}} \rightarrow M(i,j)$ .

## Supplementary Figure 4

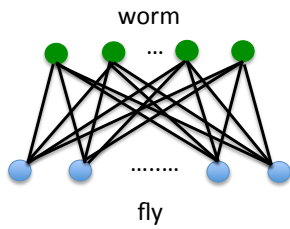

| Number of worm genes | Number of fly genes | Number of modules by unweighted clustering | Number of modules by weighted clustering |
|----------------------|---------------------|--------------------------------------------|------------------------------------------|
| 67                   | 22                  | 1                                          | 68                                       |
| 20                   | 43                  | 1                                          | 31                                       |
| 8                    | 25                  | 1                                          | 17                                       |
| 5                    | 23                  | 1                                          | 6                                        |
| 20                   | 8                   | 1                                          | 23                                       |
| 18                   | 12                  | 1                                          | 16                                       |
| 17                   | 17                  | 1                                          | 2                                        |
| 8                    | 17                  | 1                                          | 22                                       |
| 17                   | 2                   | 7                                          | 17                                       |
| 13                   | 10                  | 1                                          | 4                                        |

Clustering of the top bipartite cliques (many-to-many orthologous pairs between worm and fly) using unweighted versus weighted orthologous links. Unweighted approach cannot resolve the cliques into different clusters.

Supplementary Figure 5

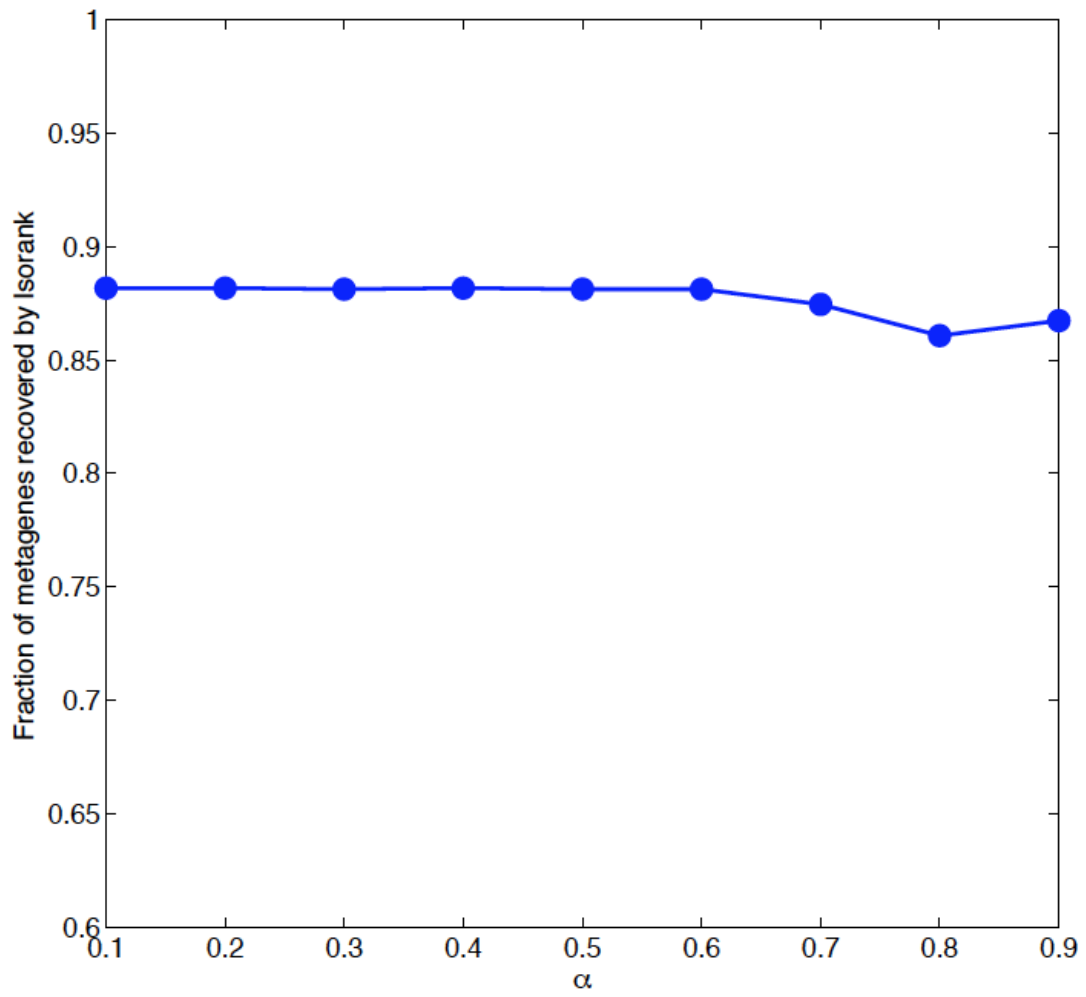

Fraction of metagenes recovered by IsoRank with respect to the intrinsic parameter  $\alpha$ .

Supplementary Figure 6

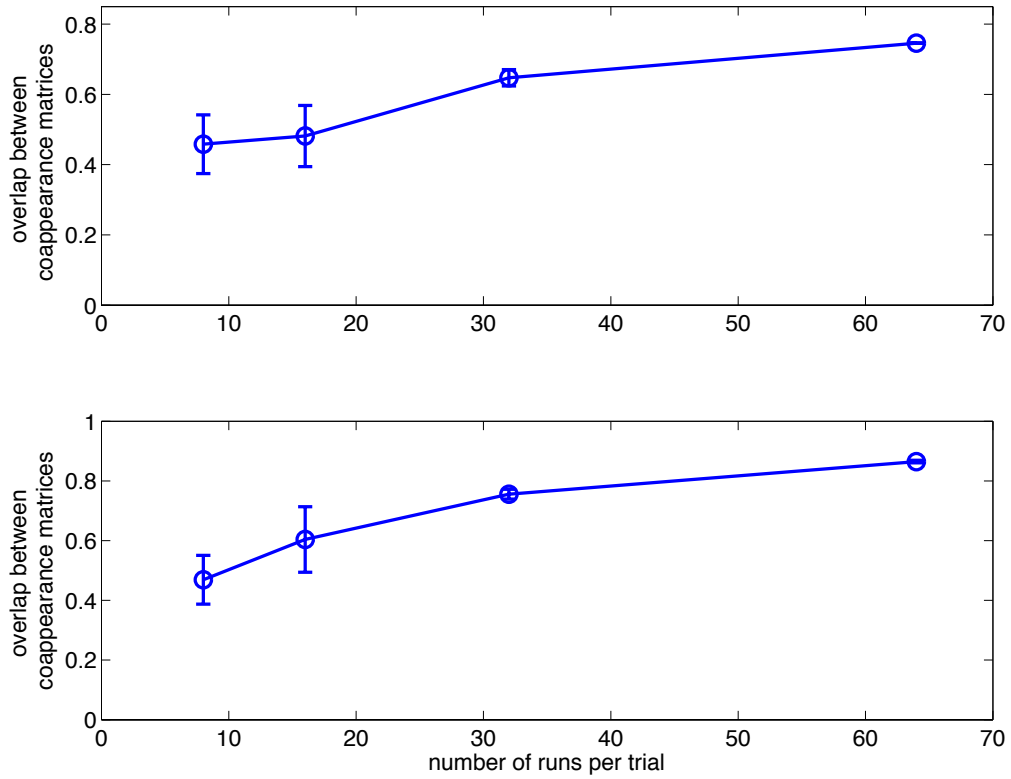

Overlap between sets of clusters. A set of clusters (a trial) is constructed by performing simulated annealing  $R$  times. Upper panel: average pairwise overlap between clusters constructed by the same number of trials. Lower panel: pairwise overlap between clusters constructed trials of  $R$  runs and trial with 128 runs.

## Supplementary Figure 7

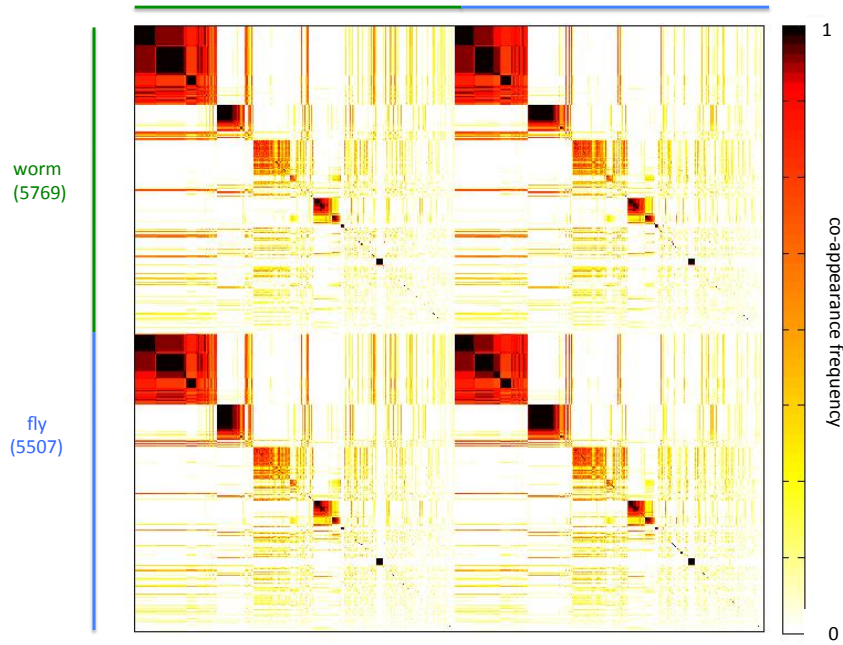

The co-appearance matrix for worm-fly orthologs. Unlike the genome-wide clustering, all the modules are conserved in nature, as evident from the block structures in the off-diagonal positions.



## Supplementary Figure 8

Figure S9

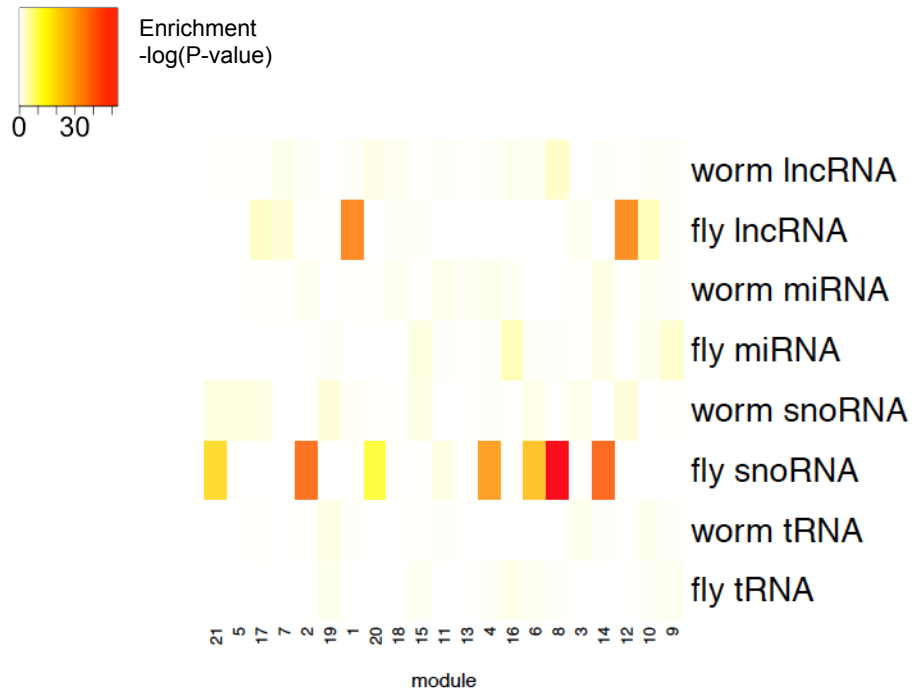

Enrichment of different classes of ncRNAs in modules. The heatmap displays the  $-\log_{10}(p\text{-values})$  of types of mapped non-coding RNA enrichments (rows) for 21 worm-fly conserved modules (columns) using the hypergeometric test.
